# Supplementary material
Source: PubMed Central journal article supplement (PMC4475934)
Supplement: pnas.201508113SI.pdf [file pnas.201508113SI.pdf]

# Supporting Information

Koo et al. 10.1073/pnas.1508113112

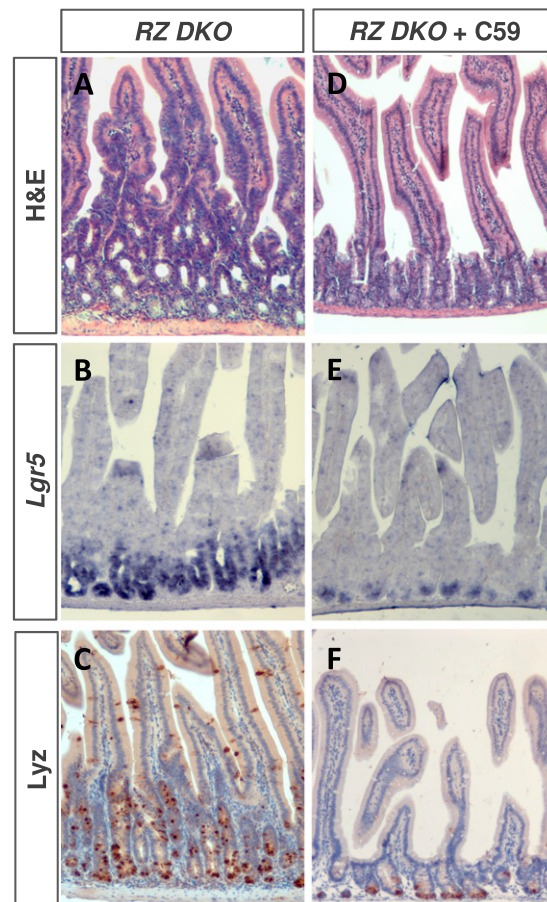

**Fig. S1.** Porcupine inhibitor C59 prevents tumorigenic outgrowth of *Rnf43* and *Znrf3* mutant epithelia. Mice were treated with C59 porcupine inhibitor for seven consecutive days upon tamoxifen (Tam) administration to *RZ* (*D–F*) mutant mice. C59 untreated, but tamoxifen-treated *RZ* mutant mouse was used as tumorigenic positive control (*A–C*). Sections were analyzed by *Lgr5*, a marker for intestinal stem cells (*B* and *E*), and Lysozyme (Lyz), a marker for Paneth cells (*C* and *F*).
